# Supplementary material for: Molecular phylogenetics of cool-season grasses in the subtribes Agrostidinae, Anthoxanthinae, Aveninae, Brizinae, Calothecinae, Koeleriinae and Phalaridinae (Poaceae, Pooideae, Poeae, Poeae chloroplast group 1)
Source: PubMed Central journal article supplement (PMC5672130; doi:10.3897/phytokeys.87.12774), 2017-10-09
Supplement: phytokeys-87-001-s011.pdf [file phytokeys-87-001-s011.pdf]

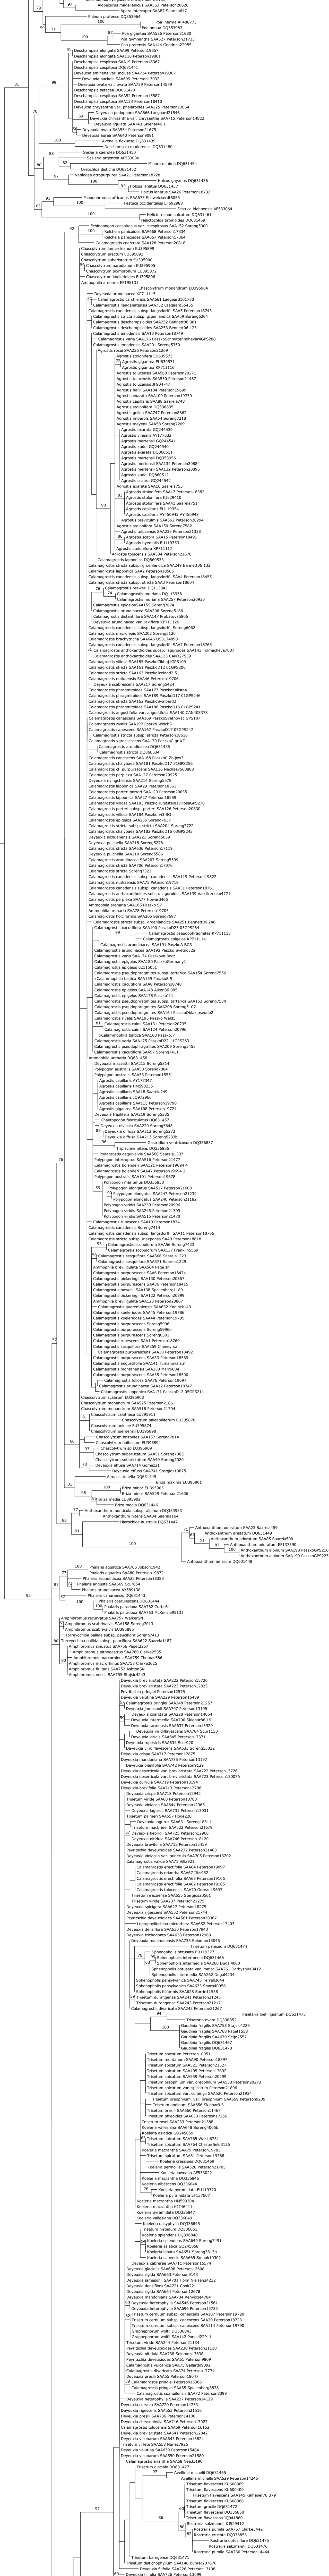

Bromus vulgaris KM97437
