# Supplementary material for: Molecular phylogenetics of cool-season grasses in the subtribes Agrostidinae, Anthoxanthinae, Aveninae, Brizinae, Calothecinae, Koeleriinae and Phalaridinae (Poaceae, Pooideae, Poeae, Poeae chloroplast group 1)
Source: PhytoKeys. 2017 Oct 9;(87):1–139. doi: 10.3897/phytokeys.87.12774 (PMC5672130; doi:10.3897/phytokeys.87.12774)
Supplement: Supplementary material 10 — Maximum likelihood phylogram inferred from psbA–rps19–trnH sequence data [file phytokeys-87-001-s010.pdf]

psbA-rps19-trnH

Vahlodea atropurpurea SAA21 Peterson18728

Holcus lanatus SAA26 Peterson18732

Amphibromus macrochirus SAA759 Thomas586  
Torreyochloa pallida subsp. pauciflora SAA622 Saarela1187

Amphibromus fluitans SAA752 Ashton s.n.  
Amphibromus pithogastrus SAA769 Clarke2535  
Amphibromus macrochirus SAA753 Clarke2625

Amphibromus sinuatus SAA756 Page2257  
Amphibromus neesii SAA755 Stajsic4243  
Amphibromus scabrivalvis SAA158 Soreng7013

Amphibromus recurvatus SAA757 Walker s.n.  
Phalaris paradoxa SAA752 Curt661  
Phalaris paradoxa SAA763 McKenzie95131

Phalaris aquatica SAA80 Peterson19672  
Phalaris aquatica SAA766 Johnson1942  
Phalaris arundinacea SAA22 Peterson18383

Phalaris angusta SAA669 Scur654  
Phalaris minor SAA749 Strudwick689

Ammophila breviligulata SAA123 Peterson20867

Calamagrostis canadensis subsp. langsdorffii SAA97 Peterson18711

Calamagrostis lapponica SAA29 Peterson18561

Calamagrostis canadensis subsp. langsdorffii SAA44 Peterson18455

Calamagrostis lapponica SAA172 PaszkoD17 15GPS249

Calamagrostis distantiflora SAA147 Probatova5806

Calamagrostis canadensis subsp. langsdorffii SAA94 Peterson18615

Calamagrostis lapponica SAA255 Soreng6163

Calamagrostis brachytricha SAA646 US3174890

Calamagrostis arundinacea SAA112 Peterson18747

Calamagrostis lapponica SAA27 Peterson18559

Calamagrostis arundinacea SAA206 Soreng186

Calamagrostis purpurea SAA188 PaszkoD2 08GPS134

Calamagrostis angustifolia var. angustifolia SAA140 CAN408378

Calamagrostis canadensis subsp. langsdorffii SAA5 Peterson18743

Calamagrostis chalybaea SAA182 PaszkoD16 03GPS243

Calamagrostis purpurea SAA186 PaszkoD16 01GPS241

Calamagrostis rubescens SAA10 Peterson18741

Calamagrostis rubescens SAA32 Peterson18768

Calamagrostis canadensis var. canadensis SAA31 Peterson18761

Calamagrostis porteri subsp. porteri SAA129 Peterson20835

Calamagrostis cf. purpurascens SAA136 Nethae560888

Calamagrostis montanensis SAA40 Peterson18398

Calamagrostis lapponica SAA171 PaszkoD12 05GPS211

Calamagrostis porteri subsp. porteri SAA126 Peterson20830

Calamagrostis stricta subsp. inexpansa SAA9 Peterson18618

Echinopogon caespitosus var. caespitosus SAA152 Soreng5900

Deyeuxia pulchella SAA218 Soreng5278

Calamagrostis phragmitoides SAA177 PaszkoKalist4

Calamagrostis arundinacea SAA207 Soreng5599

Calamagrostis purpurea SAA187 PaszkoD13 10GPS226

Calamagrostis canadensis subsp. langsdorffii SAA11 Peterson18766

Calamagrostis canadensis subsp. langsdorffii SAA7 Peterson18765

Calamagrostis canadensis subsp. langsdorffii SAA92 Peterson18498

Calamagrostis canadensis canadensis SAA119 Peterson18822

Calamagrostis bolanderi SAA121 Peterson19694 4

Calamagrostis bolanderi SAA47 Peterson19694 2

Podagrostis aequivalvis SAA568 Saarela1307

Anthoxanthum alpinum SAA198 PaszkoGPS210

Anthoxanthum alpinum SAA199 PaszkoGPS225

Agrostis exarata SAA16 Saarela755

Agrostis imberbis SAA54 Soreng7218

Agrostis scabra SAA15 Peterson18491

Agrostis hallii SAA104 Peterson19699

Agrostis toluensis SAA530 Peterson21487

Agrostis toluensis SAA534 Peterson21670

Polypogon elongatus SAA240 Peterson21182

Polypogon monspeliensis SAA83 Peterson19669

Polypogon elongatus SAA247 Peterson21234

Agrostis stolonifera SAA41 Saarela751

Agrostis breviculmis SAA533 Peterson21841

Agrostis gigantea SAA108 Peterson19724

Agrostis capillaris SAA18 Saarela249

Agrostis gigantea SAA151 Soreng7550

Agrostis capillaris SAA115 Peterson19798

Polypogon elongatus SAA517 Peterson21688

Polypogon viridis SAA239 Peterson20996

Polypogon viridis SAA515 Peterson21470

Polypogon viridis SAA245 Peterson21309

Polypogon australis SAA50 Soreng7084

Polypogon australis SAA53 Peterson15551

Agrostis gigantea SAA96 Peterson18662

Agrostis toluensis SAA235 Peterson21338

Polypogon interruptus SAA516 Peterson21477

Agrostis gelida SAA747 Peterson8862

Agrostis breviculmis SAA748 Peterson17933

Agrostis breviculmis SAA562 Peterson20924

Agrostis toluensis SAA560 Peterson20271

Agrostis mertensii SAA134 Peterson20884

Agrostis mertensii SAA132 Peterson20895

Agrostis toluensis SAA531 Peterson21523

Agrostis capillaris SAA88 Saarela748

Agrostis stolonifera SAA150 Soreng7582

Agrostis exarata SAA109 Peterson19730

Agrostis scabra SAA39 Saarela272

Agrostis stolonifera SAA17 Peterson18382

Agrostis mayenii SAA58 Soreng7209

Deyeuxia mazzetti SAA215 Soreng5314

Deyeuxia diffusa SAA212 Soreng5272

Deyeuxia diffusa SAA213 Soreng5233b

Deyeuxia nivicola SAA220 Soreng5648

Deyeuxia tripilifera SAA219 Soreng5385

Agrostis rosei SAA236 Peterson21269

Calamagrostis canii SAA124 Peterson20796

Calamagrostis canii SAA131 Peterson20795

Calamagrostis anthoxanthoides SAA135 CAN327539

Calamagrostis epigeios SAA178 PaszkoJ17

xCalamagrostis baltica SAA160 PaszkoJ7

xCalamagrostis baltica SAA159 Paszko5 9

Calamagrostis epigeios SAA148 Aiken86 005

Calamagrostis pseudophragmites subsp. tartarica SAA153 Soreng7534

Calamagrostis varia SAA175 PaszkoD22 11GPS263

Calamagrostis xacutiflora SAA57 Soreng7411

Calamagrostis rivalis SAA195 Paszko Wald5

Calamagrostis pseudophragmites SAA209 Soreng5455

Calamagrostis pseudophragmites SAA208 Soreng5107

Calamagrostis pseudophragmites subsp. tartarica SAA154 Soreng7556

Calamagrostis epigeios SAA200 Soreng3161

Calamagrostis xacutiflora SAA8 Peterson18748

Calamagrostis xacutiflora SAA190 PaszkoD23 03GPS264

Calamagrostis epigeios SAA125 Saarela1368

Calamagrostis pseudophragmites SAA164 PaszkoOblaz pseudo2

Calamagrostis epigeios SAA180 PaszkoGermany1

Calamagrostis varia SAA174 Paszkova Bocz

Calamagrostis arundinacea SAA191 PaszkoA BG3

Calamagrostis arundinacea SAA193 Paszko Svetnov28

Calamagrostis arundinacea SAA192 Paszko Szym1

Calamagrostis murlana SAA257 Peterson20930

Calamagrostis arundinacea SAA194 PaszkoD20 124 1

Anthoxanthum odoratum SAA23 Saarela459

Deyeuxia scabrescens SAA216 Soreng5613

Deyeuxia effusa SAA714 Gomez21

Calamagrostis pickeringii SAA130 Peterson20857

Calamagrostis purpurascens SAA93 Peterson18545

Chascolytrum monandrum SAA525 Peterson18861

Chascolytrum brizoides SAA157 Soreng7014

Chascolytrum subaristatum SAA51 Soreng7005

Chascolytrum subaristatum SAA49 Soreng7020

Chascolytrum monandrum SAA518 Peterson21704

Anthoxanthum nitens SAA84 Saarela164

Calamagrostis pickeringii SAA122 Peterson20899

Calamagrostis anthoxanthoides subsp. laguiroides SAA139 Vassiliczenko4771

Calamagrostis purpurascens SAA38 Peterson18492

Calamagrostis foliosa SAA76 Peterson19697

Calamagrostis purpurascens SAA35 Peterson18500

Calamagrostis purpurascens SAA35 Peterson18415

Calamagrostis howellii SAA138 Spellenberg1189

Calamagrostis scopulorum SAA56 Soreng7423

Calamagrostis nutkaensis SAA75 Peterson19718

Deyeuxia pulchella SAA210 Soreng5586

Calamagrostis stricta subsp. groenlandica SAA250 Bennett06 208

Calamagrostis lapponica SAA28 Peterson18587

Calamagrostis epigeios SAA203 Soreng7573b

Calamagrostis rubescens SAA1 Peterson18769

Calamagrostis stricta subsp. inexpansa SAA400 TalbotAIK010 06

Deyeuxia rupestris SAA708 Renvoize4176

Calamagrostis stricta subsp. inexpansa SAA399 TalbotADO052 20

Calamagrostis stricta subsp. inexpansa SAA401 TalbotADO030 25

Calamagrostis stricta subsp. groenlandica SAA59 Soreng6204

Calamagrostis stricta SAA161 PaszkoD12 01GPS206

Calamagrostis stricta subsp. groenlandica SAA249 Bennett06 132

Calamagrostis stricta SAA163 PaszkoIceland2 5

Calamagrostis emodensis SAA201 Soreng5350

Calamagrostis perplexa SAA127 Peterson20925

Calamagrostis stricta SAA162 PaszkoValbard2

Calamagrostis stricta SAA256 Peterson17076

Calamagrostis stricta subsp. stricta SAA3 Peterson18604

Calamagrostis canescens SAA169 PaszkoSvetnov1c GPS107

Calamagrostis xgracilescens SAA170 PaszkoC gr XZ

Calamagrostis canescens SAA167 PaszkoD17 07GPS247

Calamagrostis rivalis SAA197 Paszko Welch3

Calamagrostis canescens SAA168 PaszkoC Zbjow3

Calamagrostis villosa SAA183 PaszkoHundstein1villosaGPS278

Calamagrostis villosa SAA185 PaszkoChiny1GPS109

Calamagrostis emodensis SAA13 Peterson18749

Calamagrostis perplexa SAA77 Howard465

Calamagrostis macrolepis SAA202 Soreng5120

Calamagrostis nutkaensis SAA46 Peterson19706

Calamagrostis deschampsii SAA253 Bennett06 123

Calamagrostis deschampsii SAA252 Bennett06 381

Calamagrostis stricta SAA636 Peterson17119

Calamagrostis stricta SAA706 Peterson17076

Deyeuxia schuensis SAA221 Soreng5659

Calamagrostis villosa SAA184 Paszko v3 BG

Calamagrostis stricta subsp. groenlandica SAA251 Bennett06 246

Calamagrostis epigeios SAA156 Soreng7637

Calamagrostis guatemalensis SAA632 Koninck143

Calamagrostis koelerioides SAA45 Peterson19786

Reichela panicoides SAA668 Peterson17334

Reichela panicoides SAA667 Peterson17364

Calamagrostis rubescens SAA14 Peterson18767

Calamagrostis chalybaea SAA181 PaszkoD17 31GPS256

Calamagrostis lapponica SAA2 Peterson18585

Calamagrostis rivalis SAA196 PaszkoKloster4

Ammophila arenaria SAA166 PaszkoJ6

Calamagrostis stricta subsp. stricta Peterson18616

Calamagrostis epigeios SAA155 Soreng7674

Ammophila arenaria SAA165 Paszko5 7

Calamagrostis stricta subsp. stricta SAA204 Soreng7722

Calamagrostis purpurascens SAA6 Peterson18474

Ammophila arenaria SAA78 Peterson19705

Deyeuxia rosea SAA211 Soreng5542

Deyeuxia nyingchensis SAA214 Soreng5578

Calamagrostis sesquiflora SAA571 Saarela1229

Calamagrostis varia SAA566 Saarela1223

Calamagrostis varia SAA176 PaszkoSchmittenhohevar4GPS288

Calamagrostis sesquiflora SAA259 Cheney s.n.

Calamagrostis carchiensis SAA661 Laegaard101730

Calamagrostis llanganathensis SAA732 Laegaard55455

Calamagrostis purpurea SAA189 PaszkoD17 01GPS246

Calamagrostis holciformis SAA205 Soreng7697

Calamagrostis lapponica SAA173 PaszkoD2 09GPS134

Deyeuxia scabrescens SAA217 Soreng5424

Calamagrostis purpurascens SAA95 Peterson18652

Calamagrostis scopulorum SAA137 Franklin569

Calamagrostis purpurascens SAA37 Peterson18609

Calamagrostis purpurascens SAA33 Peterson18569

Calamagrostis koelerioides SAA44 Peterson19795

Calamagrostis anthoxanthoides subsp. laguiroides SAA143 Tolmacheva7087

Ammophila breviligulata SAA564 Page s.n.

Calamagrostis coerctata SAA128 Peterson20818

Briza minor SAA529 Peterson21636

Avena fatua SAA89 Saarela779

Avena sativa SAA570 Saarela775

Arrhenatherum elatius SAA567 Saarela903

Helictotrichon tianschanicum SAA149 Soreng7580

Deyeuxia recta SAA540 Peterson21865

Calamagrostis eriantha SAA68 Nee33190

Deyeuxia heterophylla SAA546 Peterson21561

Deyeuxia coerctata SAA228 Peterson14064

Deyeuxia brevistarata SAA223 Peterson12825

Calamagrostis pringlei SAA65 Spellenberg8878

Peyritschia deyeuxioides SAA232 Peterson21403

Peyritschia deyeuxioides SAA238 Peterson21110

Trisetum virileti SAA658 Nunez7926

Calamagrostis divaricata SAA243 Peterson21267

Peyritschia deyeuxioides SAA61 Peterson9809

Calamagrostis erectifolia SAA64 Peterson19097

Calamagrostis erectifolia SAA63 Peterson19106

Calamagrostis erectifolia SAA62 Peterson19105

Calamagrostis divaricata SAA74 Peterson17774

Calamagrostis vulcanica SAA73 Gallard90952

Trisetum irazuense SAA655 Stergios20561

Trisetum durangense SAA242 Peterson21217

Trisetum viride SAA60 Peterson18783
